# Supplementary material for: Use of Fermented Red Clover Isoflavones in the Treatment of Overactive Bladder in Postmenopausal Women: A Randomized, Double-Blinded, Placebo-Controlled Trial
Source: MDPI journal article supplement (doi:10.3390/nu15194165), 2023-09-27
Supplement: s1 [file s1]

# Use of fermented red clover isoflavones in the treatment of overactive bladder in postmenopausal women: A randomized, double-blinded, placebo-controlled trial

Annemarie B. Villadsen <sup>1,2</sup>, Julie N. Holm-Jacobsen <sup>1</sup>, Bala K. Prabhala <sup>3</sup>, Caspar Bundgaard-Nielsen <sup>1,2</sup>, Pam Huntjens <sup>1</sup>, Jette B. Kornum <sup>4</sup>, Karin Glavind <sup>5</sup>, Peter D. C. Leutscher <sup>1,2</sup>, Lars P. Christensen <sup>3</sup>, Per B. Jeppesen <sup>6</sup>, Suzette Sørensen <sup>1,2,7</sup>, Louise T. S. Arenholt <sup>1,2,8,\*</sup>

Supplemental Figure S1: Food diary. Comparison of a subset of randomly selected participants (N=20) to test for reproducibility between two different analyzers.

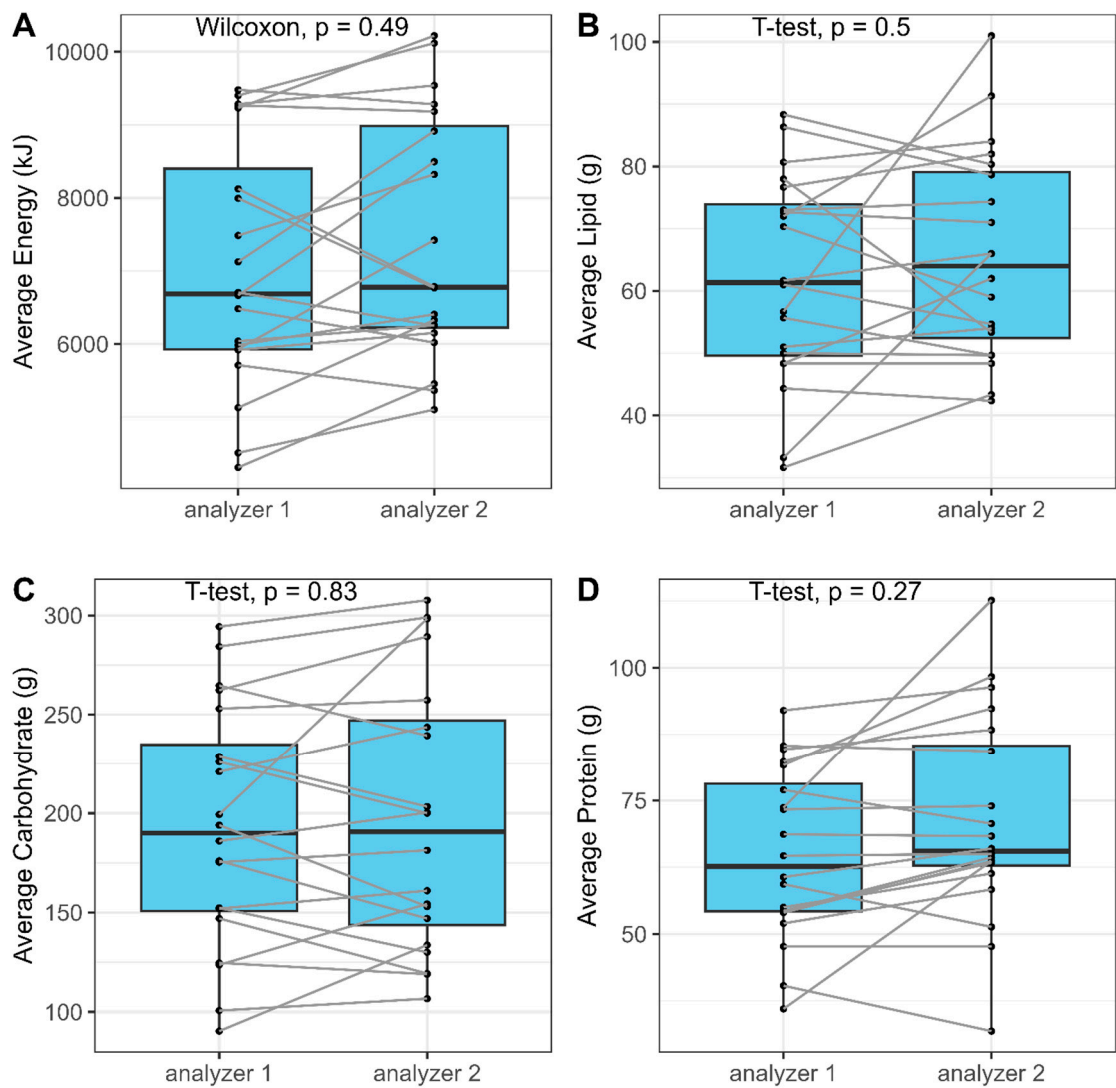

**Supplemental Table S1: Red clover extract isoflavone composition and content**

| Isoflavone               | mg/kg |
|--------------------------|-------|
| Formononetin             | 541   |
| Biochanin A              | 210   |
| Genistein                | 65    |
| Daidzein                 | 14    |
| Ononin                   | 4     |
| Total isoflavone content | 834   |

**Supplemental Table S2: Fluid intake and bladder diary characteristics at baseline**

| Parameters                                                       | RCE (n=16)                         | Placebo (n=17)                     | p-value    |
|------------------------------------------------------------------|------------------------------------|------------------------------------|------------|
| Fluid intake 24-hour (mL)<br>Median (QR1-QR3)                    | 1897 (1498-2022)                   | 1883 (1617-2033)                   | 0.925      |
| Fluid intake night (mL)<br>Median (QR1-QR3)                      | 0 (0-62.5)                         | 0 (0-0)                            | 0.246      |
| 24-hour urine volume (mL)<br>Mean $\pm$ SD<br>Median (QR1-QR3)   | 1768 $\pm$ 502<br>1557 (1416-2233) | 1780 $\pm$ 503<br>1853 (1343-2192) | 0.948<br>1 |
| Nocturnal urine volume (mL)<br>Median (QR1-QR3)                  | 410 (274-612)                      | 450 (335-550)                      | 0.985      |
| Average voided volume (mL)<br>Mean $\pm$ SD                      | 198 $\pm$ 71.2                     | 206 $\pm$ 62.7                     | 0.727      |
| 24-hour frequency<br>Median (QR1-QR3)                            | 8.67 (8.17-11.0)                   | 8.33 (7.67-9.33)                   | 0.472      |
| Nocturnal frequency<br>Median (QR1-QR3)                          | 1.67 (0.67-2.33)                   | 0.67 (0.33-1.33)                   | 0.119      |
| Daytime urinary frequency<br>Median (QR1-QR3)                    | 7.67 (6.83-9.17)                   | 7.67 (7-9.33)                      | 0.895      |
| 24-hour incontinence episodes<br>Median (QR1-QR3)                | 0.33 (0-1.33)                      | 0.67 (0-2)                         | 0.478      |
| Incontinence episodes night<br>Mean $\pm$ SD<br>Median (QR1-QR3) | 0.179 $\pm$ 0.647<br>0 (0-0)       | 0.157 $\pm$ 0.427<br>0 (0-0)       | 0.524      |
| 24-hour max volume (mL)<br>Median (QR1-QR3)                      | 500 (300-585)                      | 460 (350-500)                      | 0.649      |
| Daytime max volume (mL)<br>Median (QR1-QR3)                      | 440 (285-500)                      | 460 (300-500)                      | 0.506      |

Note. Mean  $\pm$  SD are stated for normally distributed data whereas median (QR1-QR3) values are stated for not normally distributed data. All volumes are in mL. RCE: red clover extract.

**Supplemental Table S3: Dietary intake registration**

| Dietary intake  | RCE (n=16) <sup>Δ</sup> |            |          | Placebo (n=17) |            |          | Difference between groups<br><i>p</i> <sup>a</sup> |
|-----------------|-------------------------|------------|----------|----------------|------------|----------|----------------------------------------------------|
|                 | Baseline                | Follow-up  | <i>p</i> | Baseline       | Follow-up  | <i>p</i> |                                                    |
| Energy, kJ      | 7043 ±1352              | 7166 ±1784 | 0.764    | 6703 ±1132     | 6488 ±1163 | 0.281    | 0.21                                               |
| Lipid, g        | 61.7 ±10.6              | 64.7 ±21.1 | 0.525    | 56.3 ±12.1     | 54.8 ±18.0 | 0.698    | 0.16                                               |
| Carbohydrate, g | 188 ±54.1               | 189 ±53.4  | 0.924    | 185 ±34.1      | 182 ±45.6  | 0.719    | 0.67                                               |
| Protein, g      | 70.2 ±11.0              | 72.7 ±15.0 | 0.574    | 67.3 ±18.8     | 64.7 ±17.6 | 0.647    | 0.171                                              |

Note. Data are displayed as an average of the three days presented as means ±SD. Data do not include

nutrient intake from supplements. <sup>Δ</sup>The food diary revealed that one woman consumed food that

contained high levels of isoflavones, though in low amounts. <sup>a</sup>Comparison of RCE (red clover extract) with

placebo at follow-up.

**Supplemental Table S4: Self-reported diseases by participants.**

| Feature                                 | RCE (n=16) | Placebo (n=16) | p-value |
|-----------------------------------------|------------|----------------|---------|
| <b>Other diseases, n (%)</b>            |            |                |         |
| <b>Central nervous system</b>           |            |                |         |
| - Stroke                                | 1 (6.25)   | 0 (0.0)        | 1       |
| - Migraine                              | 0 (0.0)    | 1 (6.25)       | 1       |
| - Parkinson's                           | 1 (6.25)   | 0 (0.0)        | 1       |
| <b>Cardiovascular</b>                   |            |                |         |
| - Arteriosclerosis                      | 0 (0.0)    | 1 (6.25)       | 1       |
| - Hypertension                          | 3 (18.8)   | 3 (18.8)       | 1       |
| - Increased cholesterol                 | 6 (62.5)   | 3 (18.8)       | 0.432   |
| <b>Lung / pulmonary</b>                 |            |                |         |
| - Chronic obstructive pulmonary disease | 1 (6.25)   | 0 (0.0)        | 1       |
| - Asthma                                | 1 (6.25)   | 1 (6.25)       | 1       |
| - Others                                | 1 (6.25)   | 0 (0.0)        | 1       |
| <b>Gastrointestinal tract</b>           |            |                |         |
| - Construction of cardiac sphincter     | 1 (6.25)   | 0 (0.0)        | 1       |
| <b>Musculoskeletal</b>                  |            |                |         |
| - Osteoarthritis                        | 7 (43.8)   | 3 (18.8)       | 0.253   |
| - Osteoporosis                          | 2 (12.5)   | 1 (6.25)       | 1       |
| - Back disease                          | 1 (6.25)   | 1 (6.25)       | 1       |
| - Hip fracture                          | 1 (6.25)   | 0 (0.0)        | 1       |
| <b>Urogenital</b>                       |            |                |         |
| - Lichen sclerosus                      | 1 (6.25)   | 0 (0.0)        | 1       |
| - Prolaps                               | 1 (6.25)   | 0 (0.0)        | 1       |
| <b>Endocrine</b>                        |            |                |         |
| - Diabetes mellitus 2                   | 1 (6.25)   | 0 (0.0)        | 1       |
| - Hypothyroidism                        | 1 (6.25)   | 1 (6.25)       | 1       |
| <b>Cancer</b>                           |            |                |         |
| - Skin cancer                           | 1 (6.25)   | 0 (0.0)        | 1       |
| - Vulva cancer                          | 1 (6.25)   | 0 (0.0)        | 1       |

Note. Percentages are calculated based on each treatment group. One woman in the placebo group did not report

current or previous other diseases (n=16). Comparison of proportions by z-test. RCE: Red clover extract
